# Supplementary material for: Data Preprocessing and Machine Learning Modeling for Rockburst Assessment
Source: MDPI journal article supplement (doi:10.3390/su151813282), 2023-09-05
Supplement: s1 [file s1]

## Supplementary Materials

Table S1 Original rockburst dataset compiled from literatures (Li et al., 2017; Pu et al., 2019; Xue et al., 2020; Yin et al., 2021; Sun et al., 2021; Guo et al., 2022; Xue et al., 2022)

| No | $\sigma_\theta$ (MPa) | $\sigma_c$ (MPa) | $\sigma_t$ (MPa) | $SCF$ | $B_1$ | $B_2$ | $W_{et}$ | $D$ (m) | Rockburst grade |
|----|-----------------------|------------------|------------------|-------|-------|-------|----------|---------|-----------------|
| 1  | 90                    | 170              | 11.3             | 0.53  | 15.04 | 0.88  | 9        | 200     | 2               |
| 2  | 90                    | 220              | 7.4              | 0.41  | 29.73 | 0.93  | 7.3      | 194     | 1               |
| 3  | 62.6                  | 165              | 9.4              | 0.38  | 17.53 | 0.89  | 9        | 400     | 1               |
| 4  | 55.4                  | 176              | 7.3              | 0.32  | 24.11 | 0.92  | 9.3      | 300     | 2               |
| 5  | 30                    | 88.7             | 3.7              | 0.34  | 23.97 | 0.92  | 6.6      | 400     | 2               |
| 6  | 48.75                 | 180              | 8.3              | 0.27  | 21.69 | 0.91  | 5        | 700     | 2               |
| 7  | 80                    | 180              | 6.7              | 0.44  | 26.87 | 0.93  | 5.5      | 250     | 1               |
| 8  | 89                    | 236              | 8.3              | 0.38  | 28.43 | 0.93  | 5        | 890     | 2               |
| 9  | 98.6                  | 120              | 6.5              | 0.82  | 18.46 | 0.90  | 3.8      | 150     | 2               |
| 10 | 108.4                 | 140              | 8                | 0.77  | 17.5  | 0.89  | 5        | NaN     | 3               |
| 11 | 57                    | 180              | 8.3              | 0.32  | 21.69 | 0.91  | 5        | NaN     | 2               |
| 12 | 50                    | 130              | 6                | 0.38  | 21.67 | 0.91  | 5        | NaN     | 2               |
| 13 | 62.5                  | 175              | 7.25             | 0.36  | 24.14 | 0.92  | 5        | NaN     | 2               |
| 14 | 75                    | 180              | 8.3              | 0.42  | 21.69 | 0.91  | 5        | NaN     | 2               |
| 15 | 11                    | 115              | 5                | 0.1   | 23    | 0.92  | 5.7      | NaN     | 0               |
| 16 | 43.4                  | 123              | 6                | 0.35  | 20.5  | 0.91  | 5        | NaN     | 2               |
| 17 | 18.8                  | 178              | 5.7              | 0.11  | 31.23 | 0.94  | 7.4      | NaN     | 0               |
| 18 | 34                    | 150              | 5.4              | 0.23  | 27.78 | 0.93  | 7.8      | NaN     | 0               |
| 19 | 56.1                  | 131.99           | 9.44             | 0.43  | 13.98 | 0.87  | 7.44     | NaN     | 2               |
| 20 | 54.2                  | 134              | 9.1              | 0.4   | 0.15  | 0.87  | 7.1      | NaN     | 2               |
| 21 | 70.3                  | 128.3            | 8.7              | 0.55  | 0.15  | 0.87  | 6.4      | NaN     | 2               |
| 22 | 60.7                  | 111.5            | 7.86             | 0.54  | 14.19 | 0.87  | 6.16     | NaN     | 3               |
| 23 | 54.2                  | 134              | 9.09             | 0.4   | 15    | 0.87  | 7.08     | NaN     | 2               |
| 24 | 70.3                  | 129              | 8.73             | 0.55  | 11.4  | 0.87  | 6.43     | NaN     | 2               |
| 25 | 91.23                 | 157.63           | 11.96            | 0.58  | 13.18 | 0.86  | 6.27     | 203     | 3               |
| 26 | 66.77                 | 148.48           | 8.47             | 0.45  | 17.53 | 0.89  | 5.08     | 827     | 1               |
| 27 | 51.5                  | 132.05           | 6.33             | 0.39  | 20.86 | 0.91  | 4.63     | 896     | 2               |
| 28 | 35.82                 | 127.93           | 4.43             | 0.28  | 28.9  | 0.93  | 3.67     | 1117    | 1               |
| 29 | 21.5                  | 107.52           | 2.98             | 0.2   | 36.04 | 0.95  | 2.29     | 1124    | 0               |
| 30 | 18.32                 | 96.41            | 2.01             | 0.19  | 47.93 | 0.96  | 1.87     | 1140    | 0               |
| 31 | 110.3                 | 167.19           | 12.67            | 0.66  | 13.2  | 0.86  | 6.83     | 983     | 3               |
| 32 | 26.06                 | 118.46           | 3.51             | 0.22  | 33.75 | 0.94  | 2.89     | 853     | 1               |
| 33 | 16.62                 | 156.86           | 10.66            | 0.11  | 14.71 | 0.87  | 4.83     | 644     | 2               |
| 34 | 16.47                 | 156.9            | 10.33            | 0.11  | 15.19 | 0.88  | 4.39     | 692     | 2               |
| 35 | 16.43                 | 157.95           | 11.06            | 0.1   | 14.28 | 0.87  | 4.99     | 970     | 3               |
| 36 | 16.3                  | 155.28           | 10.63            | 0.11  | 14.61 | 0.87  | 4.4      | 850     | 2               |
| 37 | 15.97                 | 114.07           | 11.96            | 0.14  | 9.54  | 0.81  | 2.4      | 174     | 0               |
| 38 | 19.14                 | 106.31           | 11.96            | 0.18  | 8.89  | 0.80  | 2.07     | 275     | 0               |

|    |       |        |       |      |       |      |      |      |   |
|----|-------|--------|-------|------|-------|------|------|------|---|
| 39 | 12.96 | 117.81 | 11.96 | 0.11 | 9.85  | 0.82 | 2.49 | 187  | 0 |
| 40 | 31.05 | 147.85 | 11.96 | 0.21 | 12.36 | 0.85 | 3    | 267  | 2 |
| 41 | 29.09 | 138.5  | 11.96 | 0.21 | 11.58 | 0.84 | 2.77 | 215  | 0 |
| 42 | 32.4  | 140.88 | 11.96 | 0.23 | 11.78 | 0.84 | 2.86 | 272  | 1 |
| 43 | 34.89 | 151.7  | 10.66 | 0.23 | 14.23 | 0.87 | 3.17 | 644  | 1 |
| 44 | 16.21 | 135.07 | 10.33 | 0.12 | 13.08 | 0.86 | 2.49 | 692  | 1 |
| 45 | 30.56 | 160.83 | 11.06 | 0.19 | 14.54 | 0.87 | 3.63 | 970  | 3 |
| 46 | 19.36 | 113.87 | 4.43  | 0.17 | 25.7  | 0.93 | 2.38 | 1107 | 1 |
| 47 | 33.15 | 106.94 | 2.98  | 0.31 | 35.89 | 0.95 | 2.15 | 1205 | 2 |
| 48 | 9.74  | 88.51  | 2.98  | 0.11 | 29.7  | 0.93 | 1.77 | 1184 | 0 |
| 49 | 11.75 | 83.96  | 2.98  | 0.14 | 28.17 | 0.93 | 2.15 | 1373 | 0 |
| 50 | 39.94 | 117.48 | 2.98  | 0.34 | 39.42 | 0.95 | 2.37 | 1689 | 1 |
| 51 | 39.82 | 128.46 | 2.98  | 0.31 | 43.11 | 0.95 | 2.4  | 1606 | 2 |
| 52 | 46.22 | 140.07 | 2.01  | 0.33 | 69.69 | 0.97 | 3.29 | 1220 | 1 |
| 53 | 30.95 | 123.79 | 12.67 | 0.25 | 9.77  | 0.81 | 2.57 | 920  | 1 |
| 54 | 40.99 | 186.3  | 12.67 | 0.22 | 14.7  | 0.87 | 4.1  | 785  | 2 |
| 55 | 20.82 | 122.47 | 12.67 | 0.17 | 9.67  | 0.81 | 2.81 | 772  | 1 |
| 56 | 36.09 | 164.05 | 12.67 | 0.22 | 12.95 | 0.86 | 3.59 | 644  | 2 |
| 57 | 7.28  | 52     | 3.7   | 0.14 | 14.05 | 0.87 | 1.3  | NaN  | 0 |
| 58 | 9.57  | 99.7   | 4.8   | 0.1  | 20.77 | 0.91 | 3.8  | NaN  | 0 |
| 59 | 34.15 | 54.2   | 12.1  | 0.63 | 4.48  | 0.63 | 3.17 | 920  | 1 |
| 60 | 60    | 135    | 15.04 | 0.44 | 8.98  | 0.80 | 4.86 | 1000 | 1 |
| 61 | 60    | 66.49  | 9.72  | 0.9  | 6.84  | 0.74 | 2.15 | 1000 | 1 |
| 62 | 60    | 106.38 | 11.2  | 0.56 | 9.5   | 0.81 | 6.11 | 1000 | 1 |
| 63 | 60    | 86.03  | 7.14  | 0.7  | 12.05 | 0.85 | 2.85 | 1000 | 1 |
| 64 | 60    | 149.19 | 9.3   | 0.4  | 16.04 | 0.88 | 3.5  | 1000 | 1 |
| 65 | 60    | 136.79 | 10.42 | 0.44 | 13.13 | 0.86 | 2.12 | 1000 | 1 |
| 66 | 63.8  | 110    | 4.5   | 0.58 | 24.4  | 0.92 | 6.31 | 750  | 2 |
| 67 | 2.6   | 20     | 3     | 0.13 | 6.67  | 0.74 | 1.39 | 750  | 0 |
| 68 | 44.4  | 120    | 5     | 0.37 | 24    | 0.92 | 5.1  | 750  | 1 |
| 69 | 13.5  | 30     | 2.67  | 0.45 | 11.2  | 0.84 | 2.03 | 750  | 1 |
| 70 | 70.4  | 110    | 4.5   | 0.64 | 24.4  | 0.92 | 6.31 | 700  | 2 |
| 71 | 3.8   | 20     | 3     | 0.19 | 6.67  | 0.74 | 1.39 | 700  | 0 |
| 72 | 57.6  | 120    | 5     | 0.48 | 24    | 0.92 | 5.1  | 700  | 2 |
| 73 | 19.5  | 30     | 2.67  | 0.65 | 11.2  | 0.84 | 2.03 | 700  | 2 |
| 74 | 81.4  | 110    | 4.5   | 0.74 | 24.4  | 0.92 | 6.31 | 600  | 3 |
| 75 | 4.6   | 20     | 3     | 0.23 | 6.67  | 0.74 | 1.39 | 600  | 0 |
| 76 | 73.2  | 120    | 5     | 0.61 | 24    | 0.92 | 5.1  | 600  | 2 |
| 77 | 30    | 30     | 2.67  | 1    | 11.2  | 0.84 | 2.03 | 600  | 3 |
| 78 | 15.2  | 53.8   | 5.56  | 0.28 | 9.68  | 0.81 | 1.92 | 510  | 0 |
| 79 | 88.9  | 142    | 13.2  | 0.63 | 10.7  | 0.83 | 3.62 | 510  | 3 |
| 80 | 59.82 | 85.8   | 7.31  | 0.7  | 11.7  | 0.84 | 2.78 | 510  | 2 |
| 81 | 32.3  | 67.4   | 6.7   | 0.48 | 10.1  | 0.82 | 1.1  | 510  | 0 |

|     |        |        |       |      |       |      |      |     |   |
|-----|--------|--------|-------|------|-------|------|------|-----|---|
| 82  | 30.1   | 88.7   | 3.7   | 0.34 | 23.97 | 0.92 | 6.6  | 225 | 3 |
| 83  | 18.8   | 171.5  | 6.3   | 0.11 | 27.22 | 0.93 | 7    | 375 | 0 |
| 84  | 34     | 149    | 5.9   | 0.23 | 25.25 | 0.92 | 7.6  | 435 | 1 |
| 85  | 38.2   | 53     | 3.9   | 0.72 | 13.59 | 0.86 | 1.6  | 250 | 0 |
| 86  | 11.3   | 90     | 4.8   | 0.13 | 18.75 | 0.90 | 3.6  | 100 | 0 |
| 87  | 92     | 263    | 10.7  | 0.35 | 24.58 | 0.92 | 8    | 300 | 1 |
| 88  | 62.4   | 235    | 9.5   | 0.27 | 24.74 | 0.92 | 9    | 330 | 3 |
| 89  | 43.4   | 136.5  | 7.2   | 0.32 | 18.96 | 0.90 | 5.6  | 223 | 3 |
| 90  | 11     | 105    | 4.9   | 0.1  | 21.43 | 0.91 | 4.7  | 425 | 0 |
| 91  | 46.4   | 100    | 4.9   | 0.46 | 20.4  | 0.91 | 2    | NaN | 1 |
| 92  | 23     | 80     | 3     | 0.29 | 26.8  | 0.93 | 0.85 | NaN | 1 |
| 93  | 46.2   | 105    | 5.3   | 0.44 | 19.7  | 0.90 | 2.3  | NaN | 1 |
| 94  | 35     | 133.4  | 9.3   | 0.26 | 14.34 | 0.87 | 2.9  | 204 | 1 |
| 95  | 13.9   | 124    | 4.22  | 0.11 | 29.4  | 0.93 | 2.04 | NaN | 0 |
| 96  | 17.4   | 161    | 3.98  | 0.14 | 31.4  | 0.95 | 2.19 | NaN | 1 |
| 97  | 19     | 153    | 4.48  | 0.15 | 28.1  | 0.94 | 2.11 | NaN | 1 |
| 98  | 19.7   | 142    | 4.55  | 0.16 | 27.9  | 0.94 | 2.26 | NaN | 1 |
| 99  | 18.7   | 81.2   | 10.6  | 0.23 | 7.66  | 0.77 | 1.5  | 428 | 0 |
| 100 | 23.6   | 82.8   | 11.2  | 0.29 | 7.39  | 0.76 | 1.5  | 510 | 0 |
| 101 | 28.6   | 123.6  | 11.5  | 0.23 | 10.75 | 0.83 | 2.5  | 460 | 0 |
| 102 | 72     | 120.5  | 14.9  | 0.6  | 8.09  | 0.78 | 2.5  | 580 | 0 |
| 103 | 29.8   | 132.2  | 7.8   | 0.23 | 16.95 | 0.89 | 4.6  | 460 | 0 |
| 104 | 44.6   | 130.5  | 11.09 | 0.34 | 11.77 | 0.84 | 4.6  | 530 | 0 |
| 105 | 66.1   | 135.2  | 10.9  | 0.49 | 12.4  | 0.85 | 4.6  | 569 | 1 |
| 106 | 99.4   | 129.5  | 11.3  | 0.77 | 11.46 | 0.84 | 4.6  | 650 | 1 |
| 107 | 33.6   | 156.3  | 10.2  | 0.21 | 15.32 | 0.88 | 5.2  | 515 | 1 |
| 108 | 109.5  | 155.8  | 11.77 | 0.7  | 13.24 | 0.86 | 5.2  | 650 | 2 |
| 109 | 26.9   | 92.6   | 9.52  | 0.29 | 9.73  | 0.81 | 3.7  | 520 | 1 |
| 110 | 38.3   | 90.1   | 10.2  | 0.43 | 8.83  | 0.80 | 3.7  | 550 | 2 |
| 111 | 83.9   | 95.6   | 8.69  | 0.88 | 11    | 0.83 | 3.7  | 630 | 1 |
| 112 | 55.9   | 126.8  | 6.56  | 0.44 | 19.33 | 0.90 | 8.1  | 560 | 3 |
| 113 | 109.9  | 128.5  | 9.63  | 0.86 | 13.34 | 0.86 | 8.1  | 670 | 3 |
| 114 | 59.9   | 96.5   | 8     | 0.62 | 12.06 | 0.85 | 1.8  | 570 | 1 |
| 115 | 68     | 106.8  | 6.1   | 0.64 | 17.51 | 0.89 | 7.2  | 600 | 3 |
| 116 | 50.6   | 63.83  | 5.06  | 0.79 | 12.61 | 0.85 | 2.23 | 682 | 1 |
| 117 | 50.6   | 85.36  | 4.91  | 0.59 | 17.38 | 0.89 | 3.41 | 682 | 1 |
| 118 | 50.6   | 104.97 | 6.18  | 0.48 | 16.99 | 0.89 | 10.9 | 682 | 3 |
| 119 | 50.6   | 153.1  | 10.48 | 0.33 | 14.61 | 0.87 | 3.14 | 682 | 1 |
| 120 | 120.8  | 151.6  | 10.1  | 0.8  | 15.01 | 0.88 | 20   | 490 | 3 |
| 121 | 119.32 | 138.6  | 7.74  | 0.86 | 17.91 | 0.89 | 30   | 590 | 3 |
| 122 | 95.67  | 127.37 | 10.51 | 0.75 | 12.12 | 0.85 | 30   | 595 | 3 |
| 123 | 114.44 | 174.71 | 14.42 | 0.66 | 12.12 | 0.85 | 10   | 784 | 3 |
| 124 | 127.6  | 145.42 | 13.7  | 0.88 | 10.61 | 0.83 | 10   | 858 | 3 |

|     |        |        |       |      |       |      |       |      |   |
|-----|--------|--------|-------|------|-------|------|-------|------|---|
| 125 | 126.41 | 158.03 | 14.32 | 0.8  | 11.04 | 0.83 | 10    | 951  | 3 |
| 126 | 108.53 | 113.37 | 10.43 | 0.96 | 10.87 | 0.83 | 10    | 1170 | 3 |
| 127 | 29.04  | 124.15 | 5     | 0.23 | 24.83 | 0.92 | 4.39  | 240  | 0 |
| 128 | 40.87  | 139    | 6     | 0.29 | 23.17 | 0.92 | 0.81  | 437  | 0 |
| 129 | 50.09  | 124    | 5     | 0.4  | 24.8  | 0.92 | 6.53  | 490  | 1 |
| 130 | 59.09  | 88.25  | 3.6   | 0.67 | 24.51 | 0.92 | 6.14  | 720  | 2 |
| 131 | 62.13  | 124    | 5     | 0.5  | 24.8  | 0.92 | 4.62  | 620  | 1 |
| 132 | 40.9   | 88.25  | 3.6   | 0.46 | 24.51 | 0.92 | 4.61  | 470  | 1 |
| 133 | 22.93  | 88.25  | 3.6   | 0.26 | 24.51 | 0.92 | 0.81  | 220  | 0 |
| 134 | 47.5   | 86.3   | 15.6  | 0.55 | 5.53  | 0.69 | 6.3   | 720  | 2 |
| 135 | 47.5   | 61.1   | 5.3   | 0.78 | 11.53 | 0.84 | 7.2   | 720  | 2 |
| 136 | 47.5   | 99.2   | 7.3   | 0.48 | 13.59 | 0.86 | 8.31  | 720  | 2 |
| 137 | 47.5   | 91.3   | 14.5  | 0.52 | 6.3   | 0.73 | 21    | 720  | 2 |
| 138 | 67.2   | 86.3   | 15.6  | 0.78 | 5.53  | 0.69 | 6.3   | 780  | 2 |
| 139 | 67.2   | 61.1   | 5.3   | 1.1  | 11.53 | 0.84 | 7.2   | 780  | 2 |
| 140 | 67.2   | 99.2   | 7.3   | 0.68 | 13.59 | 0.86 | 8.31  | 780  | 2 |
| 141 | 67.2   | 91.3   | 14.5  | 0.74 | 6.3   | 0.73 | 21    | 780  | 2 |
| 142 | 77     | 86.3   | 15.6  | 0.89 | 5.53  | 0.69 | 6.3   | 840  | 3 |
| 143 | 77     | 61.1   | 5.3   | 1.26 | 11.53 | 0.84 | 7.2   | 840  | 3 |
| 144 | 77     | 99.2   | 7.3   | 0.78 | 13.59 | 0.86 | 8.31  | 840  | 3 |
| 145 | 77     | 91.3   | 14.5  | 0.84 | 6.3   | 0.73 | 21    | 840  | 3 |
| 146 | 225.5  | 86.3   | 15.6  | 2.61 | 5.53  | 0.69 | 6.3   | 900  | 3 |
| 147 | 225.5  | 61.1   | 5.3   | 3.69 | 11.53 | 0.84 | 7.2   | 900  | 3 |
| 148 | 225.5  | 99.2   | 7.3   | 2.27 | 13.59 | 0.86 | 8.31  | 900  | 3 |
| 149 | 225.5  | 91.3   | 14.5  | 2.47 | 6.3   | 0.73 | 21    | 900  | 3 |
| 150 | 274.3  | 86.3   | 15.6  | 3.18 | 5.53  | 0.69 | 6.3   | 960  | 3 |
| 151 | 274.3  | 61.1   | 5.3   | 4.49 | 11.53 | 0.84 | 7.2   | 960  | 3 |
| 152 | 274.3  | 99.2   | 7.3   | 2.77 | 13.59 | 0.86 | 8.31  | 960  | 3 |
| 153 | 274.3  | 91.3   | 14.5  | 3    | 6.3   | 0.73 | 21    | 960  | 3 |
| 154 | 297.8  | 86.3   | 15.6  | 3.45 | 5.53  | 0.69 | 6.3   | 1020 | 3 |
| 155 | 297.8  | 61.1   | 5.3   | 4.87 | 11.53 | 0.84 | 7.2   | 1020 | 3 |
| 156 | 297.8  | 99.2   | 7.3   | 3    | 13.59 | 0.86 | 8.31  | 1020 | 3 |
| 157 | 297.8  | 91.3   | 14.5  | 3.26 | 6.3   | 0.73 | 21    | 1020 | 3 |
| 158 | 77.69  | 74.04  | 8.96  | 1.05 | 8.26  | 0.78 | 1.33  | 805  | 0 |
| 159 | 77.07  | 78.3   | 6.8   | 0.98 | 11.51 | 0.84 | 3.11  | 795  | 2 |
| 160 | 67.18  | 132.2  | 16.4  | 0.51 | 8.06  | 0.78 | 3.97  | 635  | 2 |
| 161 | 75.03  | 128.6  | 13    | 0.58 | 9.89  | 0.82 | 5.76  | 762  | 2 |
| 162 | 80.54  | 237.2  | 17.66 | 0.34 | 13.43 | 0.86 | 6.38  | 851  | 2 |
| 163 | 80.04  | 171.3  | 22.6  | 0.47 | 7.58  | 0.77 | 7.27  | 843  | 3 |
| 164 | 72.56  | 304.2  | 20.9  | 0.24 | 14.56 | 0.87 | 10.57 | 722  | 3 |
| 165 | 47.56  | 58.5   | 3.5   | 0.81 | 16.71 | 0.89 | 5     | 900  | 1 |
| 166 | 43.62  | 78.1   | 3.2   | 0.56 | 24.41 | 0.92 | 6     | 1030 | 1 |
| 167 | 47.56  | 80.3   | 3.5   | 0.59 | 22.94 | 0.92 | 5     | 1032 | 2 |

|     |       |        |       |      |       |      |      |      |   |
|-----|-------|--------|-------|------|-------|------|------|------|---|
| 168 | 44.71 | 82.4   | 4.7   | 0.54 | 17.53 | 0.89 | 6.6  | 900  | 2 |
| 169 | 25.7  | 59.7   | 1.3   | 0.43 | 45.9  | 0.96 | 1.7  | 362  | 0 |
| 170 | 26.9  | 62.8   | 2.1   | 0.42 | 29.9  | 0.94 | 2.4  | 374  | 1 |
| 171 | 40.4  | 72.1   | 2.1   | 0.56 | 34.3  | 0.94 | 1.9  | 775  | 1 |
| 172 | 39.4  | 65.2   | 2.3   | 0.6  | 28.3  | 0.93 | 3.4  | 799  | 2 |
| 173 | 38.2  | 71.4   | 3.4   | 0.53 | 21    | 0.91 | 3.6  | 811  | 2 |
| 174 | 45.7  | 69.1   | 3.2   | 0.66 | 21.5  | 0.91 | 4.1  | 816  | 2 |
| 175 | 35.8  | 67.8   | 3.8   | 0.52 | 17.8  | 0.89 | 4.3  | 841  | 2 |
| 176 | 39.4  | 69.2   | 2.7   | 0.57 | 25.6  | 0.92 | 3.8  | 959  | 2 |
| 177 | 40.6  | 66.6   | 2.6   | 0.61 | 25.6  | 0.92 | 3.7  | 984  | 2 |
| 178 | 39    | 70.1   | 2.4   | 0.56 | 29.2  | 0.93 | 4.8  | 1112 | 2 |
| 179 | 57.2  | 80.6   | 2.5   | 0.71 | 32.2  | 0.94 | 5.5  | 981  | 3 |
| 180 | 55.6  | 114    | 2.3   | 0.49 | 49.5  | 0.96 | 4.7  | 808  | 2 |
| 181 | 56.9  | 123    | 2.7   | 0.46 | 45.5  | 0.96 | 5.2  | 799  | 2 |
| 182 | 62.1  | 132    | 2.4   | 0.47 | 55    | 0.96 | 5    | 768  | 2 |
| 183 | 29.7  | 116    | 2.7   | 0.26 | 42.9  | 0.95 | 3.7  | 764  | 1 |
| 184 | 29.1  | 94     | 2.6   | 0.31 | 36.1  | 0.95 | 3.2  | 760  | 1 |
| 185 | 27.8  | 90     | 2.1   | 0.31 | 42.8  | 0.95 | 1.8  | 729  | 0 |
| 186 | 30.3  | 88     | 3.1   | 0.34 | 28.3  | 0.93 | 3    | 724  | 1 |
| 187 | 55.6  | 114    | 2.3   | 0.49 | 49.5  | 0.96 | 4.7  | 808  | 2 |
| 188 | 41.6  | 67.6   | 2.7   | 0.61 | 25    | 0.92 | 3.7  | 1048 | 2 |
| 189 | 40.1  | 72.1   | 2.3   | 0.55 | 31.3  | 0.94 | 4.6  | 1074 | 2 |
| 190 | 58.2  | 83.6   | 2.6   | 0.69 | 32.1  | 0.94 | 5.9  | 980  | 3 |
| 191 | 56.8  | 112    | 2.2   | 0.5  | 50.9  | 0.96 | 5.2  | 839  | 2 |
| 192 | 47.56 | 58.5   | 3.5   | 0.81 | 16.71 | 0.89 | 5    | 900  | 1 |
| 193 | 42.4  | 50     | 6.1   | 0.85 | 8.2   | 0.78 | 5.3  | 610  | 1 |
| 194 | 63.6  | 50     | 4     | 1.27 | 12.5  | 0.85 | 5.3  | 1010 | 2 |
| 195 | 18.64 | 70     | 4.85  | 0.27 | 14.43 | 0.87 | 7.27 | 400  | 3 |
| 196 | 18.2  | 60     | 1.9   | 0.3  | 31.58 | 0.94 | 2.84 | 400  | 1 |
| 197 | 53    | 147.2  | 7.18  | 0.36 | 20.5  | 0.91 | 5    | 290  | 2 |
| 198 | 16.4  | 156.23 | 10.51 | 0.1  | 14.86 | 0.87 | 4.14 | NaN  | 1 |
| 199 | 16.4  | 156.14 | 10.3  | 0.11 | 15.16 | 0.88 | 4.04 | NaN  | 1 |
| 200 | 16.4  | 157.34 | 10.55 | 0.1  | 14.91 | 0.87 | 4.26 | NaN  | 2 |
| 201 | 16.4  | 155.63 | 10.42 | 0.11 | 14.94 | 0.87 | 4.2  | NaN  | 2 |
| 202 | 12    | 30     | 5.58  | 0.4  | 5.38  | 0.69 | 5.1  | 380  | 0 |
| 203 | 50.28 | 77.3   | 7.65  | 0.65 | 10.11 | 0.82 | 2.47 | 660  | 1 |
| 204 | 50.28 | 94.7   | 5.26  | 0.53 | 18.01 | 0.89 | 2.96 | 660  | 2 |
| 205 | 50.28 | 59     | 5.23  | 0.85 | 11.28 | 0.84 | 0.88 | 660  | 0 |
| 206 | 44.8  | 77.3   | 7.65  | 0.58 | 10.11 | 0.82 | 2.47 | 630  | 1 |
| 207 | 48    | 77.3   | 7.65  | 0.62 | 10.11 | 0.82 | 2.47 | 630  | 1 |
| 208 | 53.4  | 77.3   | 7.65  | 0.69 | 10.11 | 0.82 | 2.47 | 630  | 1 |
| 209 | 54.9  | 77.3   | 7.65  | 0.71 | 10.11 | 0.82 | 2.47 | 630  | 1 |
| 210 | 44.8  | 94.7   | 5.26  | 0.47 | 18.01 | 0.89 | 2.96 | 630  | 2 |

|     |        |        |       |      |       |      |      |      |   |
|-----|--------|--------|-------|------|-------|------|------|------|---|
| 211 | 48     | 94.7   | 5.26  | 0.51 | 18.01 | 0.89 | 2.96 | 630  | 2 |
| 212 | 53.4   | 94.7   | 5.26  | 0.56 | 18.01 | 0.89 | 2.96 | 630  | 2 |
| 213 | 54.9   | 94.7   | 5.26  | 0.58 | 18.01 | 0.89 | 2.96 | 630  | 2 |
| 214 | 44.8   | 59     | 5.23  | 0.76 | 11.28 | 0.84 | 0.88 | 630  | 0 |
| 215 | 48     | 59     | 5.23  | 0.81 | 11.28 | 0.84 | 0.88 | 630  | 0 |
| 216 | 53.4   | 59     | 5.23  | 0.91 | 11.28 | 0.84 | 0.88 | 630  | 0 |
| 217 | 54.9   | 59     | 5.23  | 0.93 | 11.28 | 0.84 | 0.88 | 630  | 0 |
| 218 | 12     | 85     | 3.6   | 0.14 | 23.61 | 0.92 | 1.5  | 463  | 0 |
| 219 | 21     | 103    | 4.1   | 0.2  | 25.12 | 0.92 | 2.4  | 731  | 1 |
| 220 | 28     | 100    | 3.9   | 0.28 | 25.64 | 0.92 | 2.3  | 1456 | 1 |
| 221 | 47     | 122    | 5.5   | 0.39 | 22.18 | 0.91 | 3.4  | 1735 | 1 |
| 222 | 52     | 117    | 4.8   | 0.44 | 24.38 | 0.92 | 3.2  | 2372 | 1 |
| 223 | 42     | 117    | 4.8   | 0.36 | 24.38 | 0.92 | 3.2  | 1765 | 1 |
| 224 | 32     | 117    | 4.8   | 0.27 | 24.38 | 0.92 | 3.2  | 1878 | 1 |
| 225 | 24     | 110    | 4.4   | 0.22 | 25    | 0.92 | 3    | 630  | 1 |
| 226 | 20     | 112    | 4.7   | 0.18 | 23.83 | 0.92 | 2.5  | 630  | 0 |
| 227 | 32.8   | 160    | 6.6   | 0.21 | 24.3  | 0.92 | 4.6  | NaN  | 1 |
| 228 | 44.8   | 160    | 6.8   | 0.28 | 23.6  | 0.92 | 4.9  | NaN  | 1 |
| 229 | 50.9   | 160    | 7.5   | 0.32 | 21.3  | 0.91 | 5.3  | NaN  | 2 |
| 230 | 44.8   | 160    | 6.7   | 0.28 | 23.8  | 0.92 | 4.8  | NaN  | 1 |
| 231 | 22.4   | 160    | 6.6   | 0.14 | 24.1  | 0.92 | 4.3  | NaN  | 1 |
| 232 | 20.61  | 54.23  | 21.49 | 0.38 | 2.52  | 0.43 | 3.17 | 440  | 1 |
| 233 | 48     | 120    | 1.5   | 0.4  | 80    | 0.98 | 5.8  | 275  | 2 |
| 234 | 49.5   | 110    | 1.5   | 0.45 | 73.33 | 0.97 | 5.7  | 275  | 2 |
| 235 | 63     | 115    | 1.5   | 0.55 | 76.67 | 0.97 | 5.7  | 275  | 2 |
| 236 | 17.39  | 102.3  | 1.3   | 0.17 | 78.69 | 0.97 | 6.58 | 369  | 2 |
| 237 | 17.02  | 85.09  | 1.3   | 0.2  | 65.45 | 0.97 | 6.14 | 369  | 2 |
| 238 | 16.7   | 83.5   | 1.3   | 0.2  | 64.23 | 0.97 | 6.53 | 373  | 2 |
| 239 | 17.35  | 86.77  | 1.3   | 0.2  | 66.75 | 0.97 | 3.22 | 373  | 2 |
| 240 | 16.87  | 80.33  | 1.3   | 0.21 | 61.79 | 0.97 | 6.92 | 374  | 2 |
| 241 | 17.08  | 94.9   | 1.3   | 0.18 | 73    | 0.97 | 6.91 | 374  | 2 |
| 242 | 61.72  | 92.4   | 8.28  | 0.67 | 11.16 | 0.84 | 5.43 | 365  | 1 |
| 243 | 126.72 | 189.7  | 8.95  | 0.67 | 21.2  | 0.91 | 5.43 | 365  | 1 |
| 244 | 57.97  | 125.37 | 7.74  | 0.67 | 21.2  | 0.88 | 2.86 | 700  | 1 |
| 245 | 57.97  | 96.16  | 3.77  | 0.46 | 16.2  | 0.92 | 2.53 | 700  | 1 |
| 246 | 57.97  | 70.68  | 4.19  | 0.6  | 25.51 | 0.89 | 2.87 | 700  | 1 |
| 247 | 98.02  | 148.52 | 6.66  | 0.66 | 22.3  | 0.91 | 3.23 | NaN  | 2 |
| 248 | 116.88 | 162.33 | 12.3  | 0.72 | 13.2  | 0.86 | 5.23 | NaN  | 3 |
| 249 | 43.21  | 116.78 | 3.93  | 0.37 | 29.73 | 0.93 | 3.52 | NaN  | 1 |
| 250 | 45.92  | 109.33 | 3.34  | 0.42 | 32.77 | 0.94 | 2.97 | NaN  | 1 |
| 251 | 27.6   | 98.56  | 2.31  | 0.28 | 42.73 | 0.95 | 2.17 | NaN  | 0 |
| 252 | 76.8   | 156.73 | 7.79  | 0.49 | 20.13 | 0.91 | 3.82 | NaN  | 2 |
| 253 | 38.12  | 100.32 | 3.49  | 0.38 | 28.77 | 0.93 | 3.02 | NaN  | 1 |

|     |        |        |       |      |       |      |      |     |   |
|-----|--------|--------|-------|------|-------|------|------|-----|---|
| 254 | 102.38 | 142.2  | 5.17  | 0.72 | 27.52 | 0.93 | 4.3  | NaN | 2 |
| 255 | 110.62 | 160.32 | 9.69  | 0.69 | 16.55 | 0.89 | 5.72 | NaN | 3 |
| 256 | 40.99  | 97.6   | 6.3   | 0.42 | 15.5  | 0.88 | 3.2  | NaN | 1 |
| 257 | 58.12  | 100.2  | 3.33  | 0.58 | 30.12 | 0.94 | 4.5  | NaN | 1 |
| 258 | 23.39  | 106.32 | 2.92  | 0.22 | 36.42 | 0.95 | 1.75 | NaN | 0 |
| 259 | 81.75  | 125.77 | 12.14 | 0.65 | 10.36 | 0.82 | 5.75 | NaN | 2 |
| 260 | 90.99  | 146.75 | 7.58  | 0.62 | 19.35 | 0.90 | 4.5  | NaN | 2 |
| 261 | 61.42  | 107.75 | 3.45  | 0.57 | 31.2  | 0.94 | 3.15 | NaN | 1 |
| 262 | 104.49 | 160.75 | 13.01 | 0.65 | 12.36 | 0.85 | 5.41 | NaN | 3 |
| 263 | 86.56  | 146.72 | 7.83  | 0.59 | 18.75 | 0.90 | 4.2  | NaN | 2 |
| 264 | 118.77 | 162.7  | 5.48  | 0.73 | 29.7  | 0.93 | 3.82 | NaN | 2 |
| 265 | 35.34  | 95.5   | 2.26  | 0.37 | 42.3  | 0.95 | 2.75 | NaN | 0 |
| 266 | 39.11  | 105.7  | 2.83  | 0.37 | 37.35 | 0.95 | 3.08 | NaN | 1 |
| 267 | 18.17  | 49.1   | 1.56  | 0.37 | 31.4  | 0.94 | 3.3  | NaN | 2 |
| 268 | 21     | 60     | 3.17  | 0.35 | 18.9  | 0.90 | 1.7  | NaN | 2 |
| 269 | 31.16  | 82     | 3.87  | 0.38 | 21.2  | 0.91 | 2.3  | NaN | 2 |
| 270 | 46.38  | 74.8   | 2.98  | 0.62 | 25.1  | 0.92 | 3.2  | NaN | 2 |
| 271 | 48.64  | 76     | 4.09  | 0.64 | 18.6  | 0.90 | 2.5  | NaN | 2 |
| 272 | 22.92  | 57.3   | 1.43  | 0.4  | 40    | 0.95 | 1.5  | NaN | 2 |
| 273 | 99.09  | 112.6  | 3.74  | 0.88 | 30.1  | 0.94 | 5.2  | NaN | 2 |
| 274 | 35.16  | 79.9   | 3.12  | 0.44 | 25.6  | 0.92 | 2.5  | NaN | 1 |
| 275 | 15.84  | 49.5   | 2.16  | 0.32 | 22.9  | 0.92 | 2.8  | NaN | 2 |
| 276 | 13.02  | 65.1   | 2.28  | 0.2  | 28.5  | 0.93 | 1.2  | NaN | 2 |
| 277 | 21.12  | 52.8   | 2.18  | 0.4  | 24.2  | 0.92 | 2.3  | NaN | 2 |
| 278 | 29.12  | 57.1   | 3.34  | 0.51 | 17.1  | 0.89 | 2.2  | NaN | 2 |
| 279 | 30.9   | 238    | 7.6   | 0.13 | 31.2  | 0.94 | 7.4  | NaN | 0 |
| 280 | 64.5   | 215    | 9     | 0.3  | 24    | 0.92 | 6.6  | NaN | 2 |
| 281 | 75.5   | 151    | 18.2  | 0.5  | 8.3   | 0.78 | 3.1  | NaN | 1 |
| 282 | 68.5   | 185    | 7.7   | 0.37 | 24.1  | 0.92 | 5    | NaN | 2 |
| 283 | 75.6   | 194    | 8.9   | 0.39 | 21.7  | 0.91 | 5    | NaN | 2 |
| 284 | 57.9   | 181    | 7.5   | 0.32 | 24.1  | 0.92 | 9.3  | NaN | 2 |
| 285 | 72.6   | 173    | 8     | 0.42 | 21.7  | 0.91 | 5.2  | NaN | 2 |
| 286 | 54.9   | 183    | 9     | 0.3  | 20.4  | 0.91 | 5.1  | NaN | 1 |
| 287 | 62.7   | 196    | 9     | 0.32 | 21.7  | 0.91 | 5    | NaN | 2 |
| 288 | 24.1   | 241    | 0.4   | 0.1  | 23    | 1.00 | 5.7  | NaN | 0 |
| 289 | 50.5   | 187    | 8.6   | 0.27 | 21.7  | 0.91 | 5    | NaN | 2 |
| 290 | 78.8   | 179    | 6.7   | 0.44 | 26.7  | 0.93 | 5.5  | NaN | 1 |
| 291 | 31.2   | 156    | 13.9  | 0.2  | 11.2  | 0.84 | 3.6  | NaN | 0 |
| 292 | 61.6   | 162    | 9.2   | 0.38 | 17.6  | 0.89 | 9    | NaN | 2 |
| 293 | 78.1   | 192    | 6.5   | 0.41 | 29.7  | 0.93 | 7.3  | NaN | 1 |
| 294 | 132.4  | 172    | 9.8   | 0.77 | 17.5  | 0.89 | 5.5  | NaN | 3 |
| 295 | 14.49  | 70.21  | 2.04  | 0.21 | 34.42 | 0.94 | 3.11 | NaN | 1 |
| 296 | 17.79  | 81.8   | 2.45  | 0.22 | 33.39 | 0.94 | 3.6  | NaN | 1 |

|     |       |       |       |      |       |      |      |     |   |
|-----|-------|-------|-------|------|-------|------|------|-----|---|
| 297 | 22.21 | 90    | 3.1   | 0.25 | 29.03 | 0.93 | 4.3  | NaN | 1 |
| 298 | 25.62 | 99.6  | 3.42  | 0.26 | 29.12 | 0.93 | 4.6  | NaN | 2 |
| 299 | 25.92 | 72.8  | 2.6   | 0.36 | 28    | 0.93 | 4.4  | NaN | 2 |
| 300 | 26.68 | 46.8  | 1.8   | 0.57 | 26    | 0.93 | 2.7  | NaN | 2 |
| 301 | 30.9  | 82.56 | 6.5   | 0.37 | 12.7  | 0.85 | 3.2  | NaN | 1 |
| 302 | 61    | 171.5 | 22.6  | 0.36 | 7.59  | 0.77 | 7.5  | NaN | 1 |
| 303 | 89    | 128.6 | 13.2  | 0.69 | 9.74  | 0.81 | 4.9  | NaN | 3 |
| 304 | 12.3  | 237.1 | 17.66 | 0.05 | 13.43 | 0.86 | 6.9  | NaN | 0 |
| 305 | 55.6  | 256.5 | 18.9  | 0.22 | 13.57 | 0.86 | 9.1  | NaN | 3 |
| 306 | 67.2  | 222.6 | 10.6  | 0.3  | 21    | 0.91 | 7.8  | NaN | 3 |
| 307 | 91.3  | 225.6 | 17.2  | 0.4  | 13.12 | 0.86 | 7.3  | NaN | 3 |
| 308 | 67.73 | 112.5 | 4.1   | 0.6  | 27.44 | 0.93 | 6.02 | NaN | 2 |
| 309 | 64.43 | 112.5 | 3.4   | 0.57 | 33.09 | 0.94 | 5.8  | NaN | 1 |
| 310 | 62.88 | 112.5 | 3.4   | 0.56 | 33.09 | 0.94 | 5.62 | NaN | 2 |
| 311 | 54.51 | 99.59 | 4.1   | 0.55 | 24.29 | 0.92 | 3.26 | NaN | 3 |
| 312 | 52.08 | 112.5 | 3.4   | 0.46 | 33.09 | 0.94 | 4.68 | NaN | 2 |
| 313 | 53.93 | 112.5 | 3.4   | 0.48 | 33.09 | 0.94 | 4.5  | NaN | 2 |
| 314 | 68.98 | 112.5 | 4.1   | 0.61 | 27.44 | 0.93 | 5.32 | NaN | 2 |
| 315 | 48.7  | 180   | 8.3   | 0.27 | 21.69 | 0.91 | 5    | NaN | 3 |
| 316 | 74.9  | 180   | 8.3   | 0.42 | 21.69 | 0.91 | 5    | NaN | 3 |
| 317 | 62.4  | 175   | 7.3   | 0.36 | 23.97 | 0.92 | 5    | NaN | 3 |
| 318 | 49.9  | 130   | 6     | 0.38 | 21.67 | 0.91 | 5    | NaN | 3 |
| 319 | 62.9  | 115   | 1.5   | 0.55 | 76.67 | 0.97 | 5.7  | NaN | 3 |
| 320 | 56.9  | 180   | 8.3   | 0.32 | 21.69 | 0.91 | 5    | NaN | 3 |
| 321 | 59.9  | 200   | 9.8   | 0.3  | 20.41 | 0.91 | 5    | NaN | 2 |
| 322 | 88.9  | 236   | 8.3   | 0.38 | 28.43 | 0.93 | 5    | NaN | 3 |
| 323 | 108.3 | 140   | 8     | 0.77 | 17.5  | 0.89 | 5.5  | NaN | 3 |
| 324 | 89.9  | 220   | 7.4   | 0.41 | 29.73 | 0.93 | 7.3  | NaN | 2 |
| 325 | 29.9  | 89    | 3.7   | 0.34 | 24.05 | 0.92 | 6.6  | NaN | 3 |
| 326 | 18.7  | 179   | 5.7   | 0.1  | 31.4  | 0.94 | 7.4  | NaN | 1 |
| 327 | 89.9  | 170   | 11.3  | 0.53 | 15.04 | 0.88 | 9    | NaN | 3 |
| 328 | 54.1  | 136   | 9.2   | 0.4  | 14.78 | 0.87 | 7.1  | NaN | 3 |
| 329 | 10.9  | 115   | 5     | 0.09 | 23    | 0.92 | 5.7  | NaN | 1 |
| 330 | 48.7  | 126   | 6.4   | 0.39 | 19.69 | 0.90 | 4.9  | NaN | 3 |
| 331 | 91.2  | 231   | 7.3   | 0.39 | 31.64 | 0.94 | 7.2  | NaN | 2 |
| 332 | 92.9  | 227   | 8.6   | 0.41 | 26.4  | 0.93 | 5.2  | NaN | 3 |
| 333 | 28.7  | 148   | 5.2   | 0.19 | 28.46 | 0.93 | 8.1  | NaN | 2 |
| 334 | 47.6  | 121   | 1.7   | 0.39 | 71.18 | 0.97 | 5.3  | NaN | 3 |
| 335 | 43.3  | 123   | 6     | 0.35 | 20.5  | 0.91 | 5    | NaN | 2 |
| 336 | 55.3  | 176   | 7.3   | 0.31 | 24.11 | 0.92 | 9.3  | NaN | 3 |
| 337 | 98.5  | 120   | 6.8   | 0.82 | 17.65 | 0.89 | 3.8  | NaN | 3 |
| 338 | 33.9  | 150   | 5.4   | 0.23 | 27.78 | 0.93 | 7.8  | NaN | 2 |
| 339 | 47.9  | 120   | 1.5   | 0.4  | 80    | 0.98 | 5.8  | NaN | 3 |



|     |      |     |     |      |       |      |     |     |   |
|-----|------|-----|-----|------|-------|------|-----|-----|---|
| 340 | 49.4 | 110 | 1.5 | 0.45 | 73.33 | 0.97 | 5.7 | NaN | 3 |
| 341 | 79.9 | 180 | 6.7 | 0.44 | 26.87 | 0.93 | 5.5 | NaN | 2 |
| 342 | 56   | 130 | 9.3 | 0.43 | 13.98 | 0.87 | 7.4 | NaN | 3 |
| 343 | 60.6 | 112 | 7.9 | 0.54 | 14.18 | 0.87 | 6.2 | NaN | 3 |
| 344 | 62.5 | 165 | 9.4 | 0.38 | 17.55 | 0.89 | 9   | NaN | 2 |

Note: NaN is not available.

Table S2 Correlation coefficient matrix between initial variables and PCA factors

|                 | F1    | F2    | F3    | F4    | F5    | F6    | F7    | F8    |
|-----------------|-------|-------|-------|-------|-------|-------|-------|-------|
| $\sigma_\theta$ | 0.63  | -0.45 | 0.60  | 0.02  | -0.18 | 0.00  | 0.01  | -0.10 |
| $\sigma_c$      | 0.28  | 0.81  | 0.45  | 0.17  | -0.12 | -0.11 | -0.08 | 0.02  |
| $\sigma_t$      | 0.90  | 0.35  | -0.09 | 0.01  | 0.04  | 0.23  | 0.08  | 0.01  |
| $SCF$           | 0.49  | -0.73 | 0.40  | -0.03 | -0.18 | 0.03  | -0.02 | 0.18  |
| $B_1$           | -0.77 | 0.10  | 0.51  | -0.08 | 0.07  | 0.35  | -0.01 | 0.00  |
| $B_2$           | -0.76 | 0.24  | 0.45  | 0.14  | -0.10 | -0.29 | 0.22  | 0.03  |
| $W_{et}$        | 0.46  | 0.01  | 0.49  | -0.37 | 0.61  | -0.22 | 0.00  | 0.01  |
| $D$             | 0.02  | -0.36 | 0.09  | 0.84  | 0.39  | 0.05  | -0.01 | 0.00  |

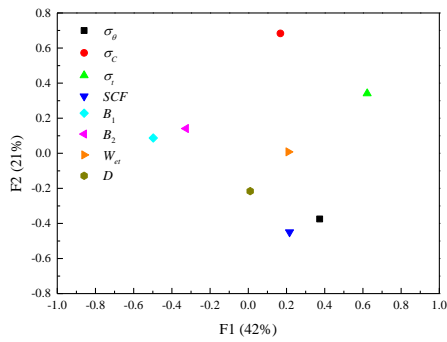

(a)

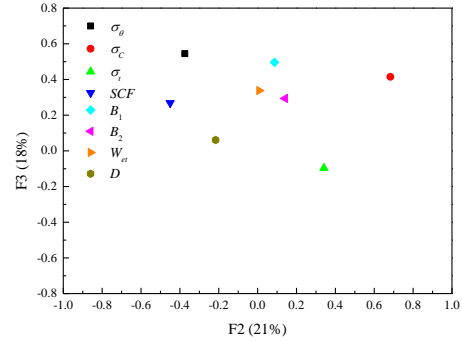

(b)

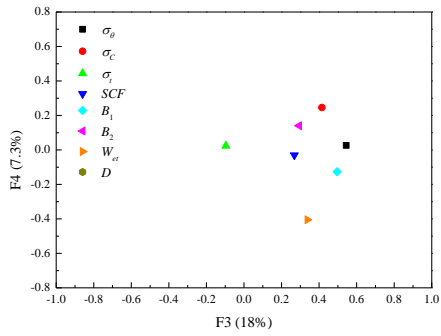

(c)

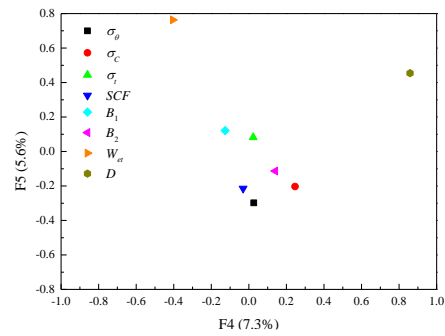

(d)

Figure S1. Factor loadings on the first five components after the PCA processing: (a) Display in F1-F2 space, (b) Display in F2-F3 space, (c) Display in F3-F4 space, (d) Display in F4-F5 space

Table S3 Loading matrix regarding the rotated factors

|                 | RF1   | RF2   | RF3   | RF4   | RF5   |
|-----------------|-------|-------|-------|-------|-------|
| $\sigma_\theta$ | 0.03  | 0.36  | 0.71  | 0.07  | -0.16 |
| $\sigma_c$      | 0.10  | 0.79  | -0.18 | -0.10 | 0.31  |
| $\sigma_t$      | -0.56 | 0.38  | -0.12 | 0.16  | 0.14  |
| $SCF$           | -0.01 | 0.06  | 0.56  | 0.02  | -0.21 |
| $B_1$           | 0.69  | 0.08  | -0.07 | 0.20  | -0.01 |
| $B_2$           | 0.44  | 0.15  | -0.02 | -0.13 | 0.12  |
| $W_{et}$        | 0.01  | 0.01  | -0.06 | 0.95  | 0.01  |
| $D$             | 0.01  | -0.27 | 0.35  | 0.04  | 0.89  |

Table S4 Correlation coefficient matrix between initial variables and rotated factors

|                 | RF1   | RF2   | RF3   | RF4   | RF5   |
|-----------------|-------|-------|-------|-------|-------|
| $\sigma_\theta$ | -0.30 | 0.46  | 0.96  | 0.54  | -0.17 |
| $\sigma_c$      | -0.06 | 0.90  | -0.28 | 0.18  | 0.45  |
| $\sigma_t$      | -0.85 | 0.58  | 0.09  | 0.41  | 0.18  |
| $SCF$           | -0.26 | 0.11  | 0.89  | 0.41  | -0.33 |
| $B_1$           | 0.92  | -0.14 | -0.24 | -0.08 | 0.02  |
| $B_2$           | 0.88  | -0.05 | -0.31 | -0.29 | 0.19  |
| $W_{et}$        | -0.20 | 0.42  | 0.26  | 0.97  | -0.02 |
| $D$             | 0.01  | -0.23 | 0.43  | 0.02  | 0.72  |

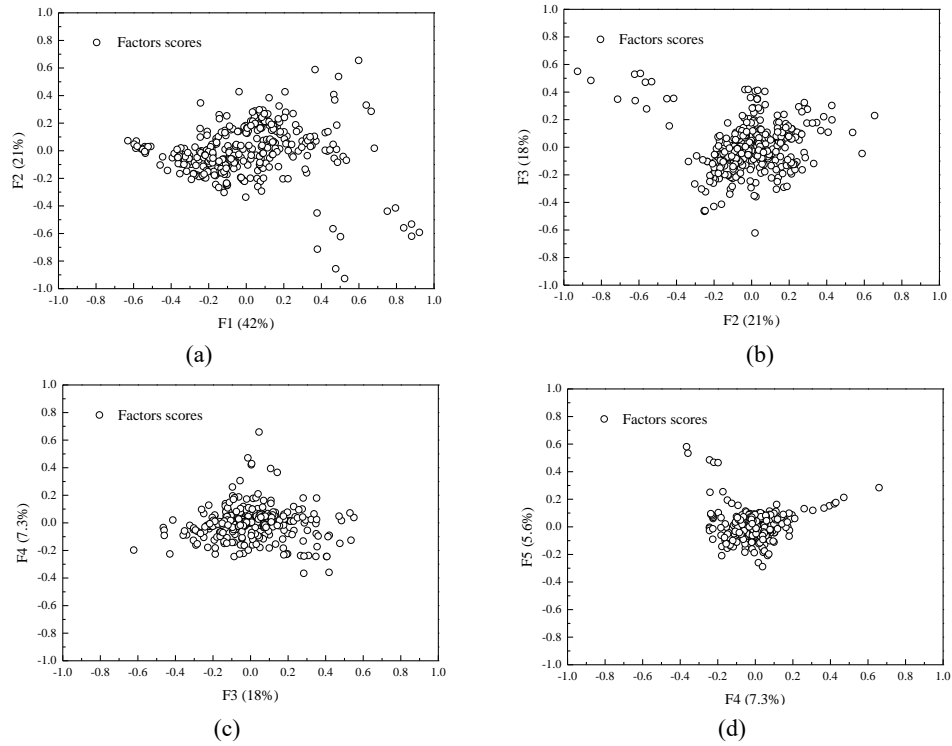

Figure S2. Factor scores on the first five components after the PCA processing: (a) Display in F1-F2 space, (b) Display in F2-F3 space, (c) Display in F3-F4 space, (d) Display in F4-F5 space

## References

- Du, Z.J., Xu, M.G., Liu, Z.P., Wu, X., 2006. Laboratory integrated evaluation method for engineering wall rock rock-burst. *Gold* 27(11), 26–30. (in Chinses)
- Jia, Q.J., Wu, L., Li, B., Chen, C.H., Peng, Y.X., 2019. The Comprehensive Prediction Model of Rockburst Tendency in Tunnel Based on Optimized Unascertained Measure Theory. *Geotech. Geol. Eng.* 37(4), 3399–3411.
- Li, T. Z., Li, Y. X., Yang, X. L., 2017. Rock burst prediction based on genetic algorithms and extreme learning machine. *J. Cent. South Univ.* 24(9), 2105–2113.
- Liu, R., Ye, Y.C., Hu, N.Y., Chen, H., Wang, X.H., 2018. Classified prediction model of rockburst using rough sets-normal cloud. *Neural Comput. Appl.* 1–9.
- Pu, Y., Apel, D. B., Xu, H., 2019. Rockburst prediction in kimberlite with unsupervised learning method and support vector classifier. *Tunn. Undergr. Sp. Tech.* 90, 12–18.
- Wu, S.C., Wu, Z.G., Zhang, C.X., 2019. Rock burst prediction probability model based on case analysis. *Tunn. Undergr. Sp. Tech.* 93, 103069. <https://doi.org/10.1016/j.tust.2019.103069>
- Xue, Y.G., Zhang, X.L., Li, S.C., Qiu, D.H., Su, M.X., Li, L.P., Li, Z.Q., Tao, Y.F., 2019. Analysis of factors influencing tunnel deformation in loess deposits by data mining: a deformation prediction model. *Eng. Geol.* 232, 94–103.
- Zhou, J., Li, X.B., Mitri, H.S., 2016. Classification of rockburst in underground projects: comparison of ten supervised learning methods. *J. Comput. Civil Eng.* 30(5), 04016003.
